# Supplementary material for: Optimization and Antibacterial Response of N-Halamine Coatings Based on Polydopamine
Source: MDPI journal article supplement (doi:10.3390/colloids6010009), 2022-01-28
Supplement: s1 [file s1]

Archive with 1 entries (1 files):
- colloids-1555084-supplementary.pdf
